# Supplementary material for: Technical note: On the importance of a three-dimensional approach for modelling the transport of neustic microplastics
Source: Copernicus journal article supplement (doi:10.5194/os-15-717-2019), 2019-06-06
Supplement: Supplementary file 1 [file os-15-717-2019-supplement.zip]

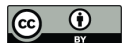

## *Supplement of*

# **Technical note: On the importance of a three-dimensional approach for modelling the transport of neustic microplastics**

**Isabel Jaló et al.**

*Correspondence to:* Isabel Jalón-Rojas (i.jalonrojas@unsw.edu.au, ijalonrojas@gmail.com)

- [os-15-717-2019-supplement-title-page.pdf](#)
- [Supplement 1.pdf](#)
- [Supplement 2.pdf](#)

The copyright of individual parts of the supplement might differ from the CC BY 4.0 License.
